# Supplementary material
Source: PubMed Central journal article supplement (PMC1236549)

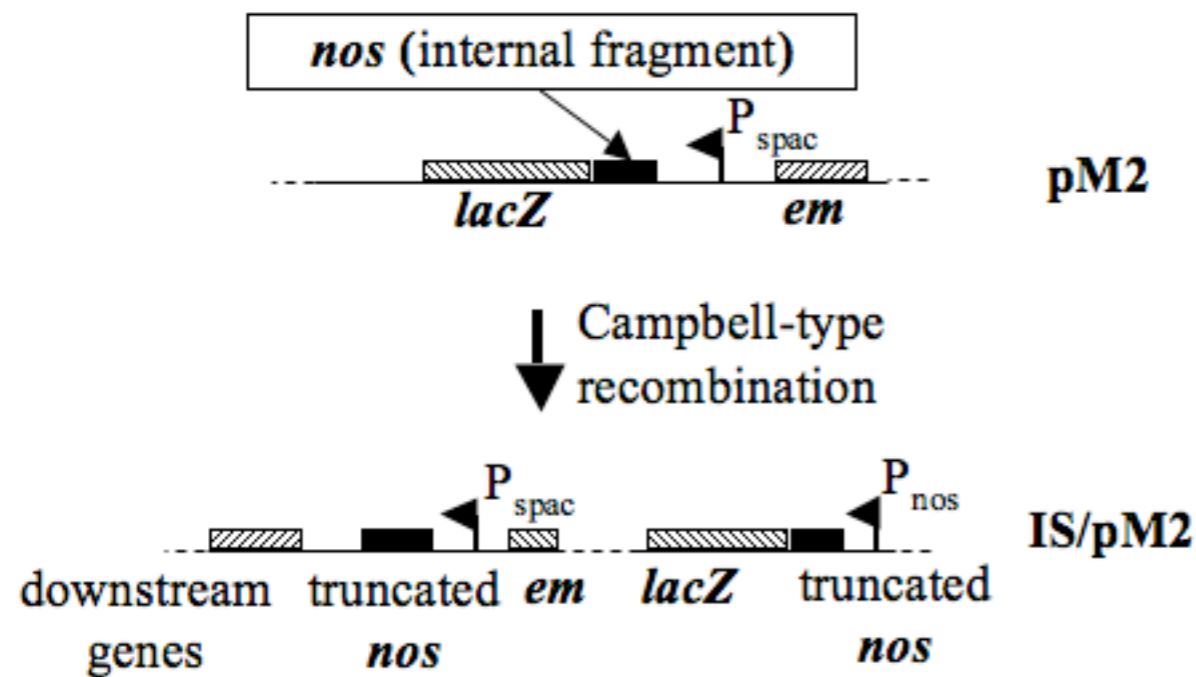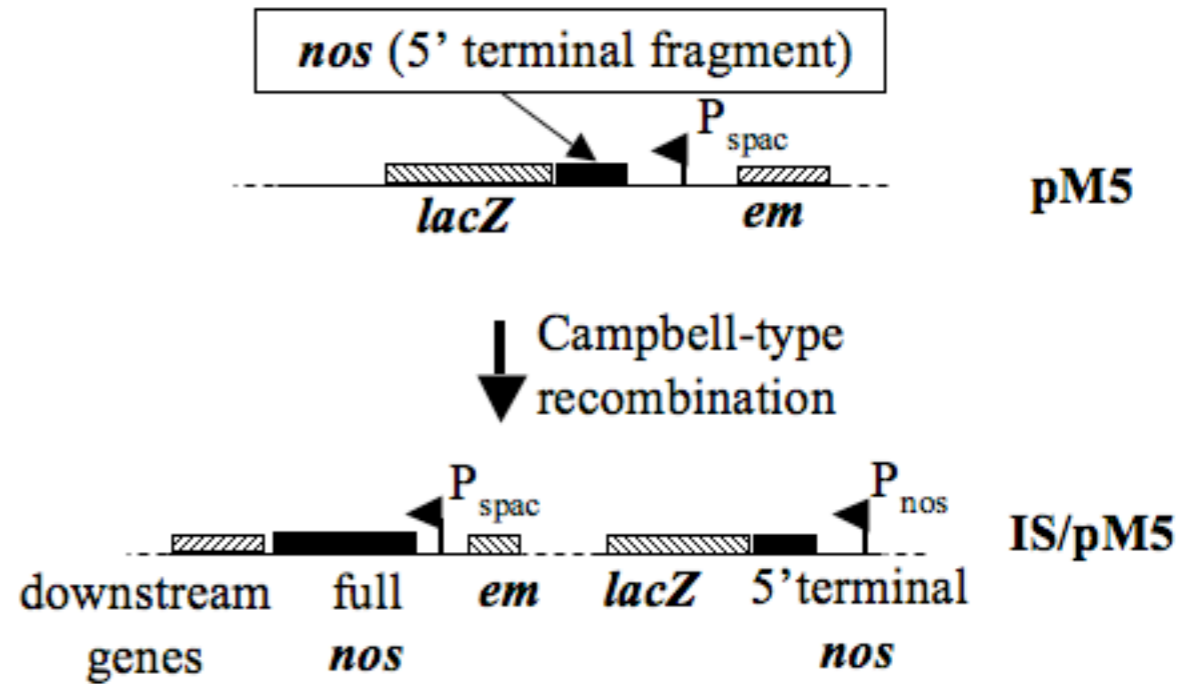

Supplement: pnas_0504307102_1.pdf [file pnas_0504307102_1.pdf]

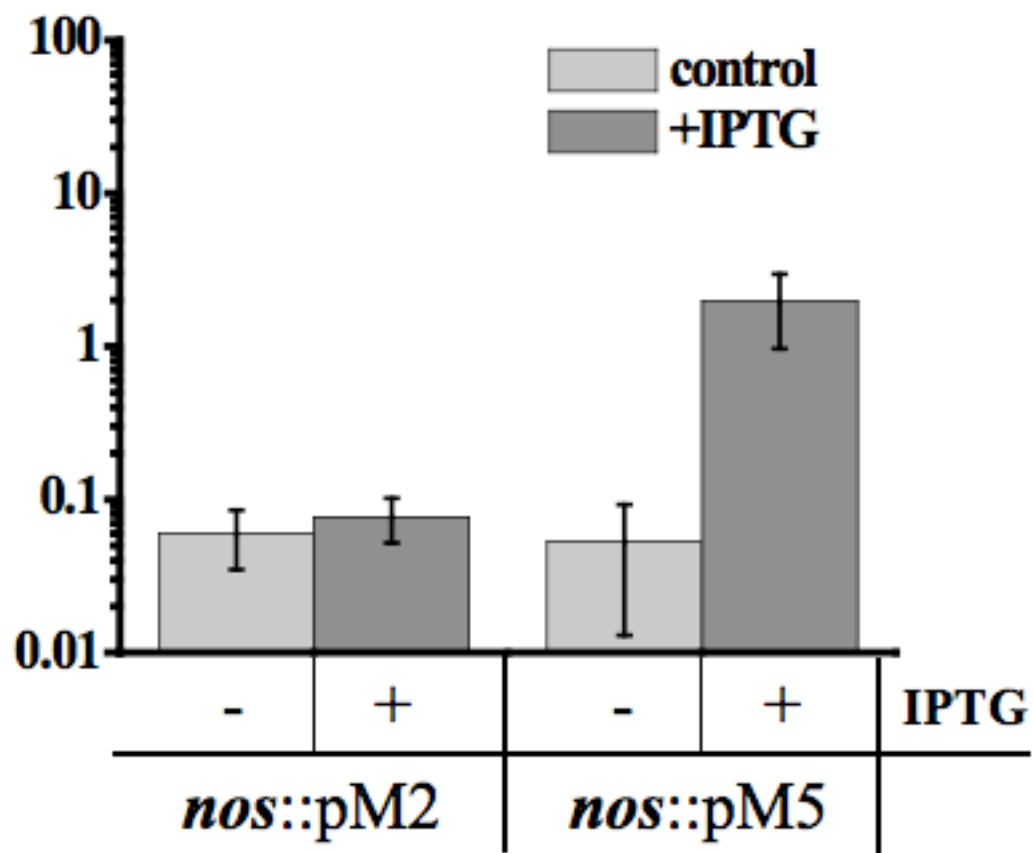

Supplement: pnas_0504307102_2.pdf [file pnas_0504307102_2.pdf]

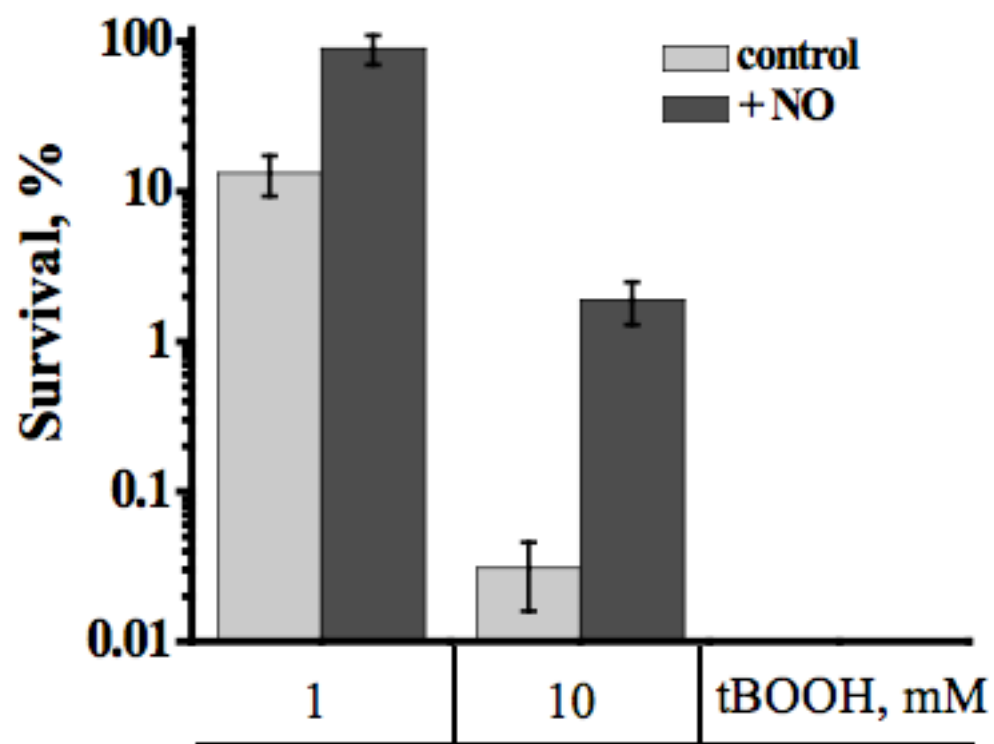

Supplement: pnas_0504307102_3.pdf [file pnas_0504307102_3.pdf]

### purified KatA

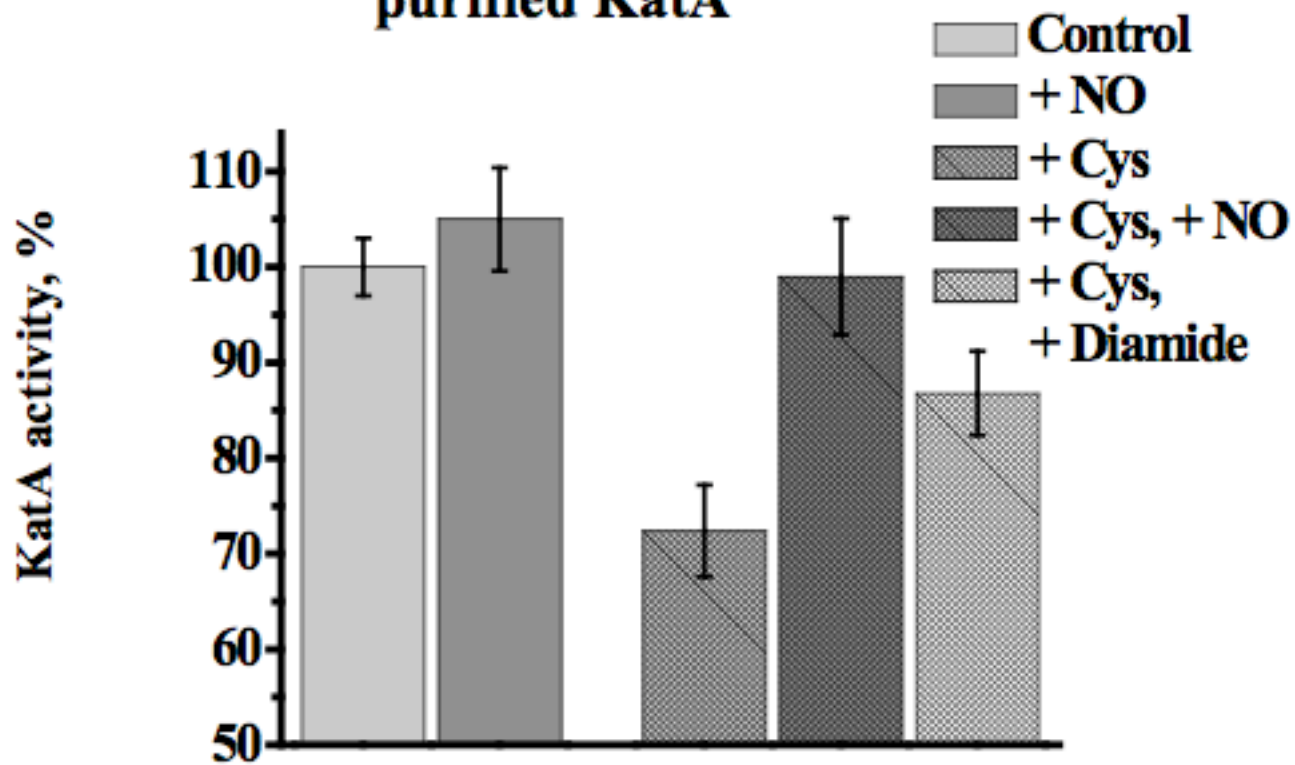

Supplement: pnas_0504307102_4.pdf [file pnas_0504307102_4.pdf]

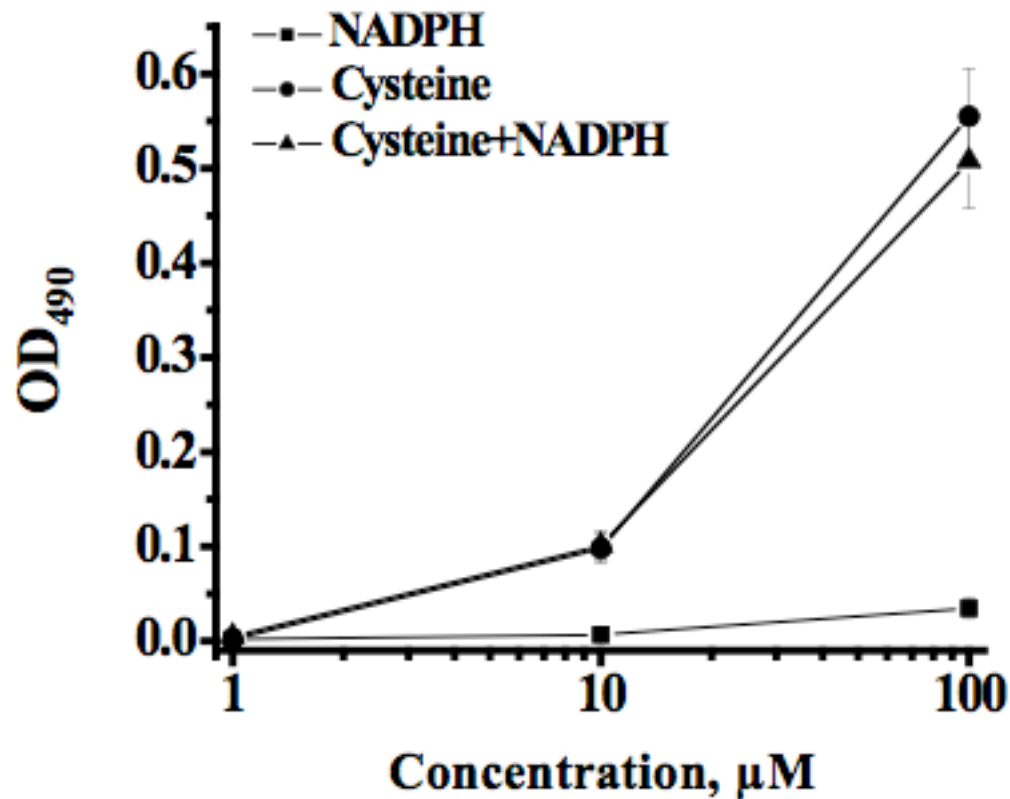

Supplement: pnas_0504307102_5.pdf [file pnas_0504307102_5.pdf]

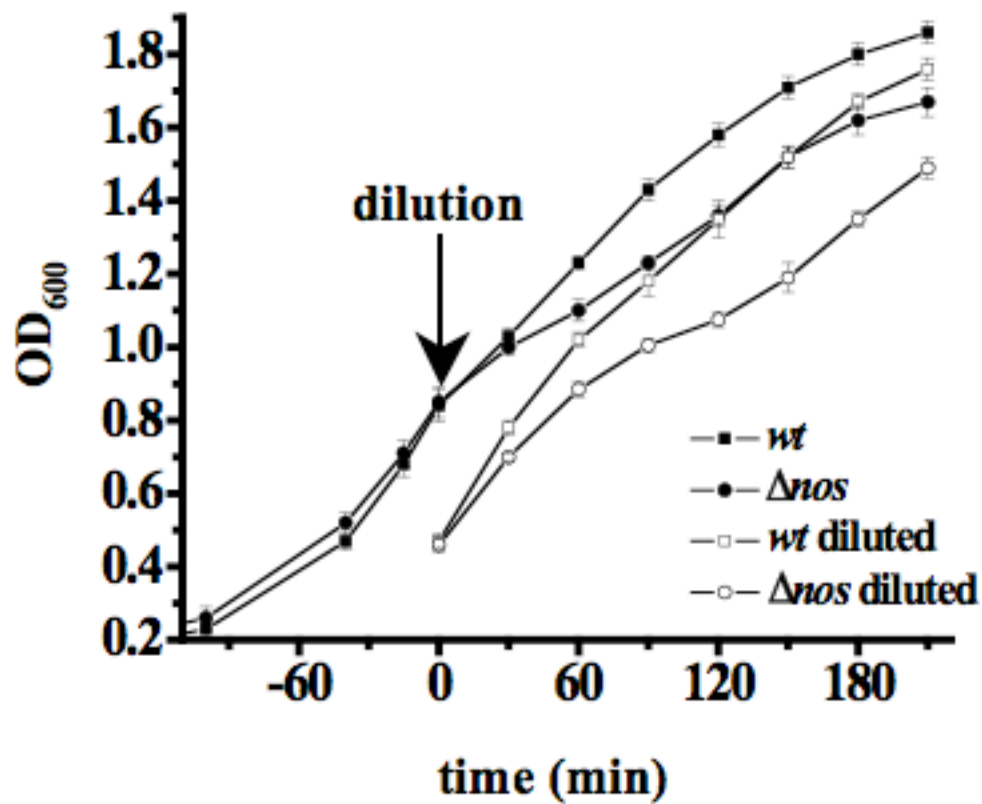

Supplement: pnas_0504307102_6.pdf [file pnas_0504307102_6.pdf]

**A**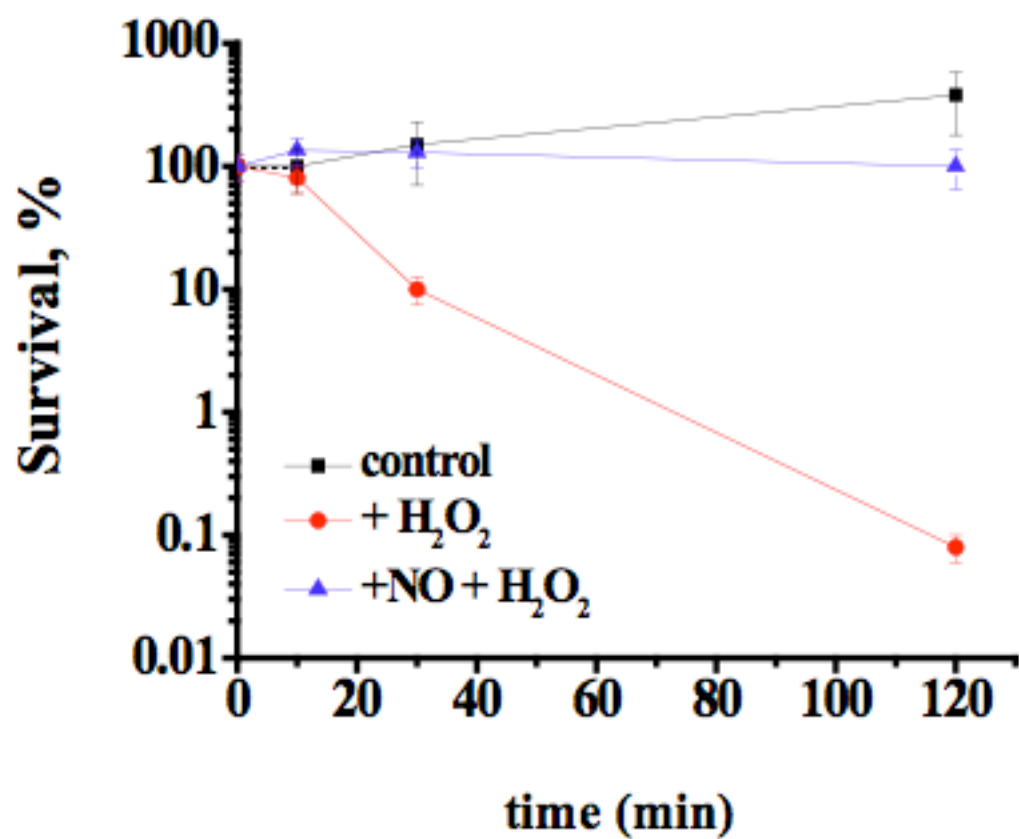**B**

120 min

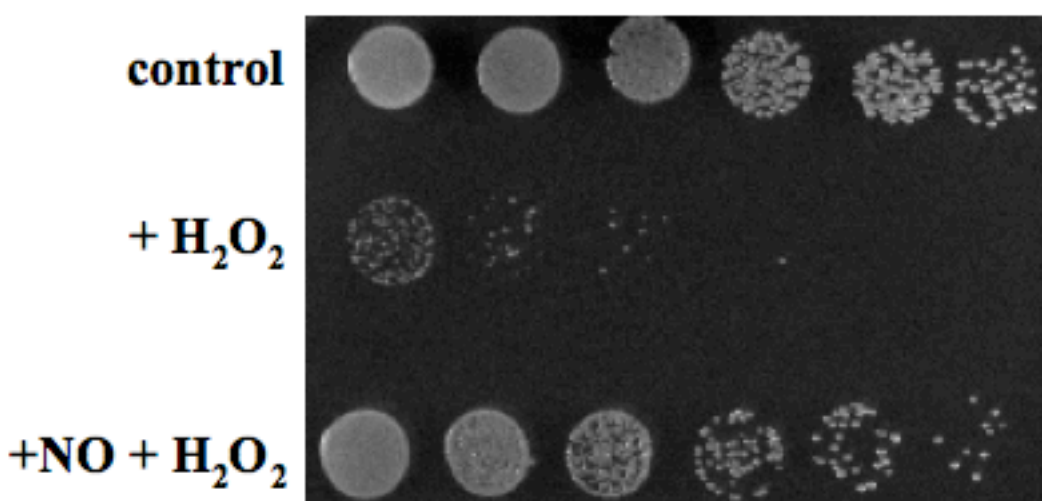

Supplement: pnas_0504307102_7.pdf [file pnas_0504307102_7.pdf]
